# Supplementary material
Source: PubMed Central journal article supplement (PMC3207421)
Supplement: supp_M111.261966_Supplementary_Information.pdf [file supp_M111.261966_Supplementary_Information.pdf]

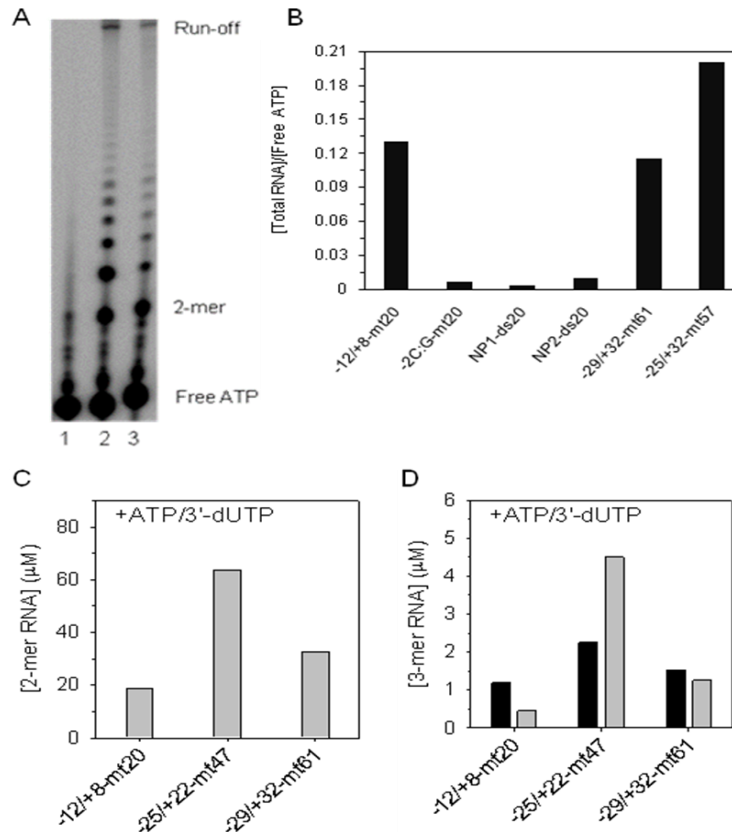

Figure S1. Comparison of transcription on promoters of different lengths.

**A.** The transcription reaction was conducted in the same way and conditions as described in *Experimental and Methods*. Lane 1, control without adding enzyme; lane 2, -25/+32-mt57 with the NT sequence: 5'-ATA ATT TAT TTA TTA TTA TAT AAG TAA TAA ATA ATT GTT TTA TAT AAT AAG AAT TCC; lane 3, -29/+32-mt61 with the NT sequence: 5'-GGC CAT AAT TTA TTT ATT ATT ATA TAA GTA ATA AAT AAT TGT TTT ATA TAA TAA GAA TTC C.

**B.** Fraction of ATP converted to RNA. Total RNA consisted of 2-8-mer for the 20-bp DNAs and from 2-mer to run-off for the long DNA templates. -25/+22-mt47 NT sequence: 5'-ATA ATT TAT TTA TTA TTA TAT AAG TAA TAA ATA ATT GTT TTA TAT CC.

**C.** The amount of 2mer synthesized on different promoter templates by addition of ATP & 3'dUTP.

**D.** The amount of 3mer synthesized on different promoter templates by addition of ATP & 3'dUTP. The correct AA3'dU 3-mer is shown as black bars while the misincorporated AAA 3-mer as gray bars.
